# Supplementary material for: 3D bioprinting of cell-laden electroconductive MXene nanocomposite bioinks
Source: Royal Society of Chemistry journal article supplement (doi:10.1039/d0nr02581j), 2020-01-01
Supplement: d0nr02581j1.pdf [file d0nr02581j1.pdf]

### **3D Bioprinting of Cell-Laden Electroconductive MXene Nanocomposite Bioinks**

Hadi Rastin, Bingyang Zhang, Arash Mazinani, Kamrul Hassan, Jingxiu Bi, Tran Tung,  
Dusan Losic\*

School of Chemical Engineering and Advanced Materials, The University of Adelaide,  
Adelaide, SA 5005, Australia

Corresponding author: Professor Dusan Losic

E-mail address: [dusan.losic@adelaide.edu.au](mailto:dusan.losic@adelaide.edu.au)

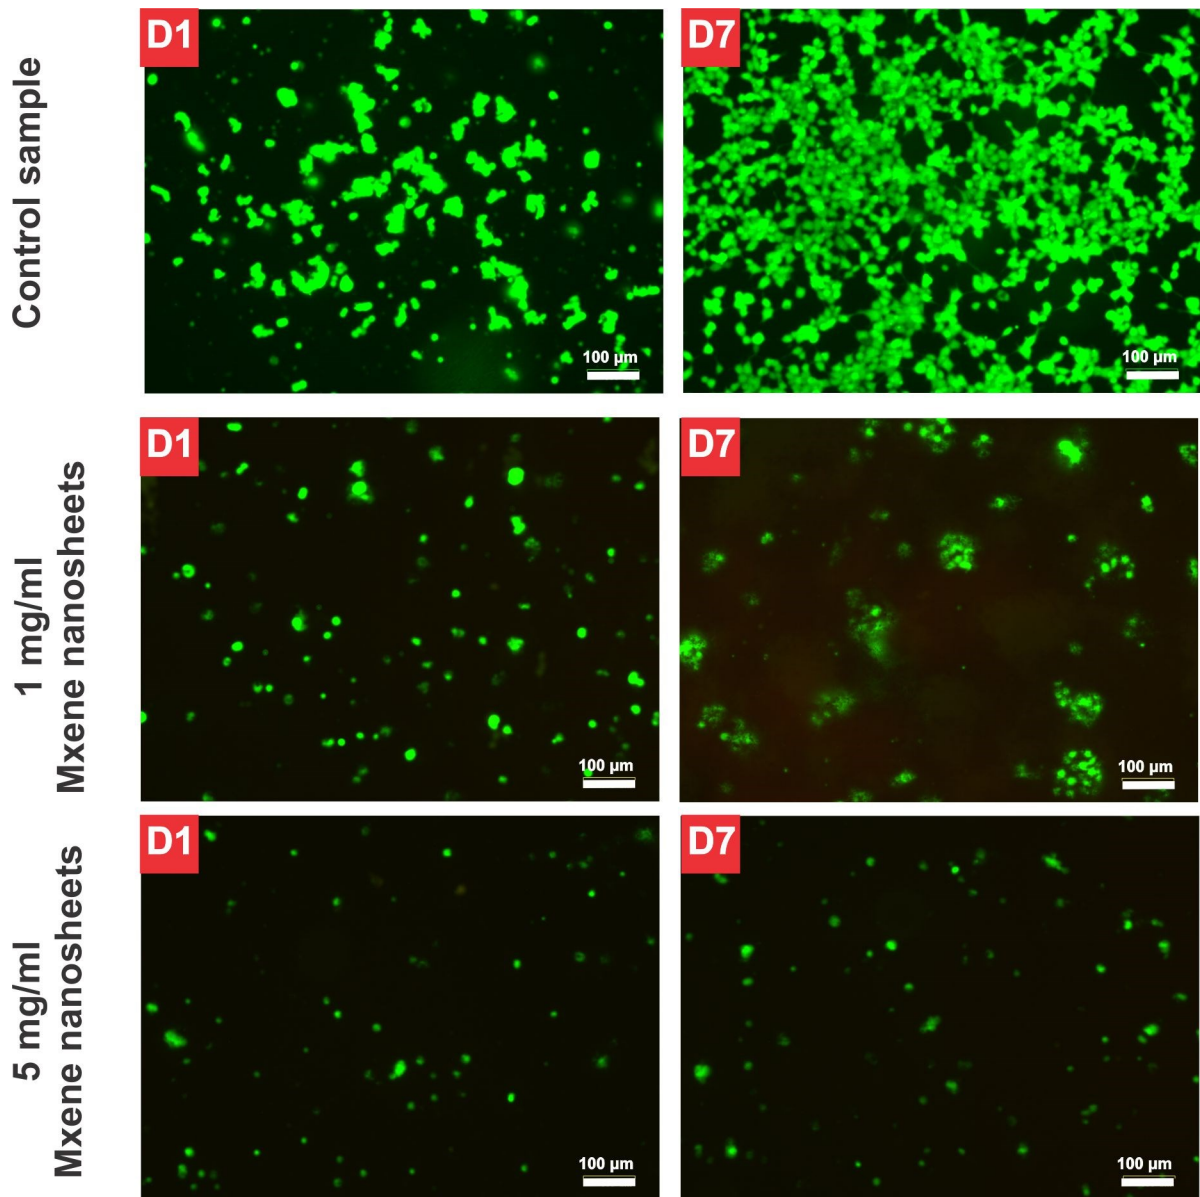

Figure S1: Fluorescent images of stained HEK-293 cells taken from 2D cell culture with different MXene nanosheets content after 1 and 7 days of culture. Cells stained with calcein-AM (green) and ethidium homodimer-1 (red)

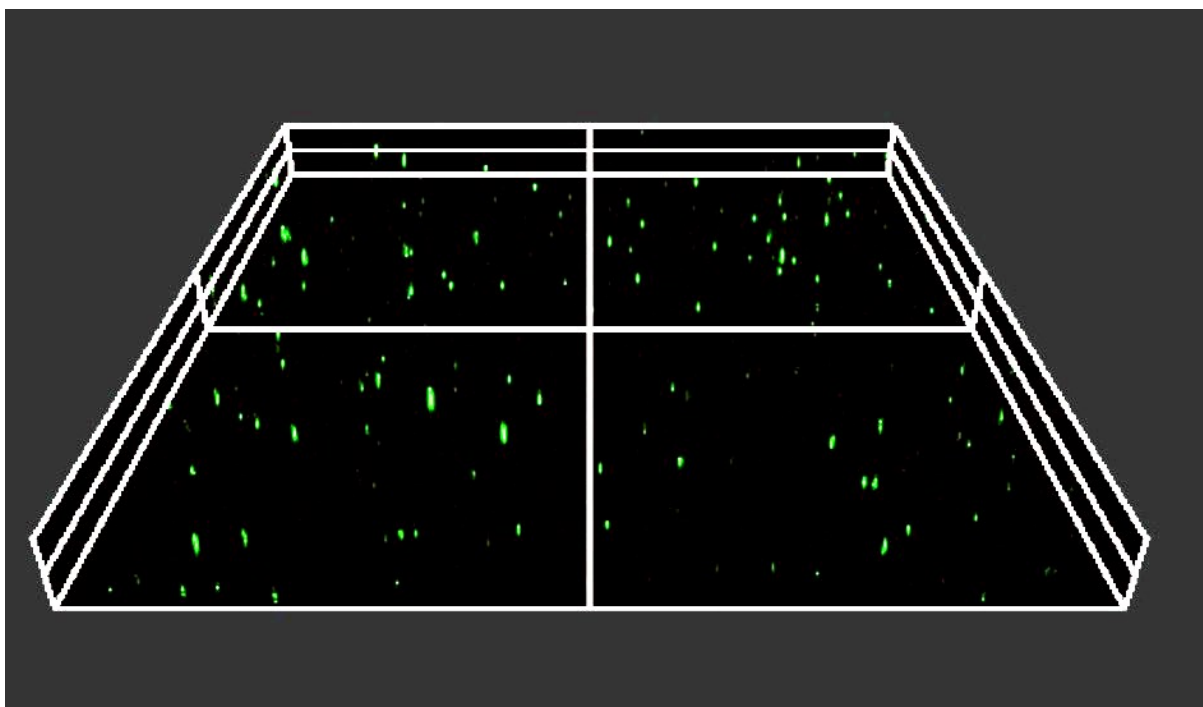

**Figure S2:** 3D Fluoresce images taken from cell-laden HA-5/Alg-1/MXene-1 ink, stained with calcein-AM (green) and ethidium homodimer-1 (red)
